# Supplementary material
Source: Springer Nature journal article supplement (https://www.springermedizin.de/resource/supplementary/13058_2011_3029_MOESM6_ESM.pdf/9702904)

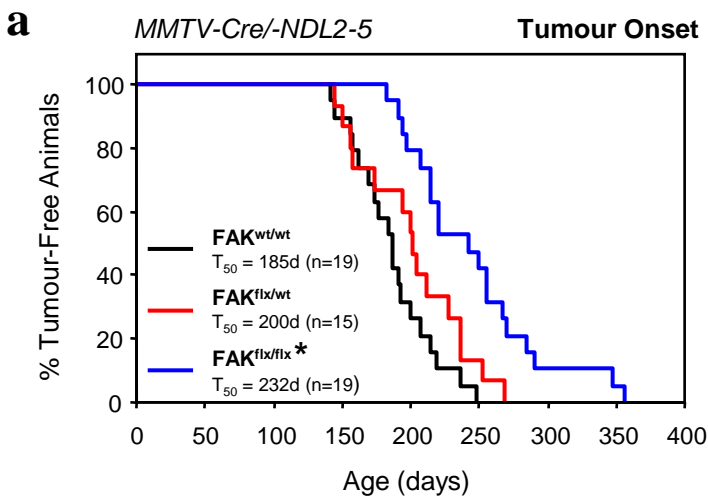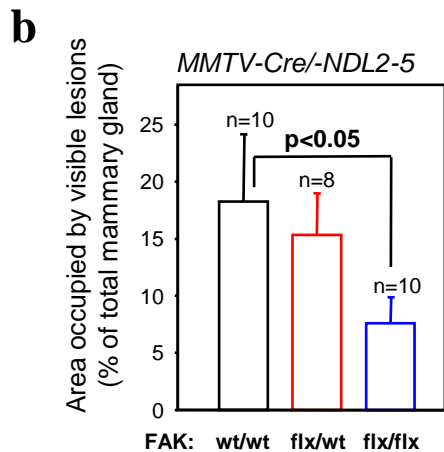

**c** *MMTV-Cre/-NDL2-5*

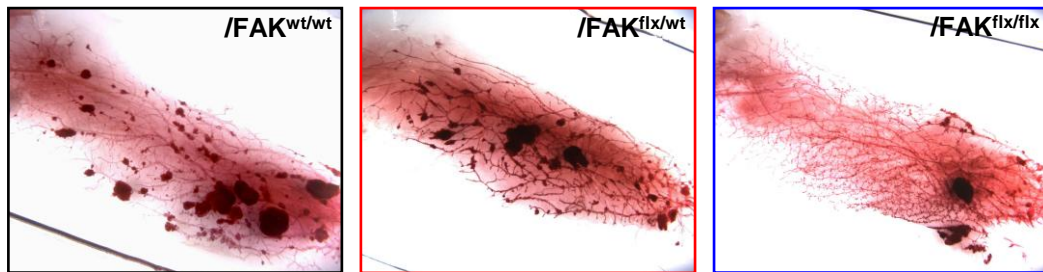

**d** *MMTV-Cre/-NDL2-5*

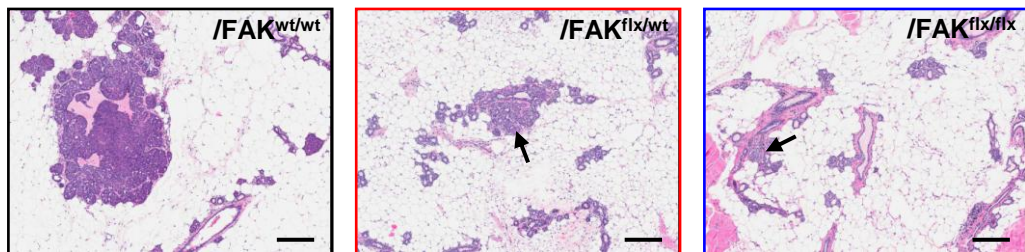

Supplement: MOESM6 [file 9702904]
